# Supplementary material
Source: PubMed Central journal article supplement (PMC117329)
Supplement: mbc_13_7_2486__1.pdf [file mbc_13_7_2486__1.pdf]

Supplemental Table 1

| Plate                                                           | Well | Int. | ORF     | Gene  | Aliases                                       | Description                                                                                                        |
|-----------------------------------------------------------------|------|------|---------|-------|-----------------------------------------------|--------------------------------------------------------------------------------------------------------------------|
| <b>Known VPS Genes</b>                                          |      |      |         |       |                                               |                                                                                                                    |
| 380                                                             | E3   | S    | YKR001C | VPS1  | GRD1, LAM1, SPO15, VPL1, VPT26                | Dynamin-like GTPase                                                                                                |
| 346                                                             | C5   | S    | YDR495C | VPS3  | PEP6, VPL3, VPT17                             | Low abundance, hydrophilic protein                                                                                 |
| 323                                                             | E9   | S    | YPR173C | VPS4  | CSC1, DID6, END13, GRD13, VPL4, VPT10         | AAA ATPase; homologous to mouse SKD1 and human hVPS4; interacts with Vps32p                                        |
| 306                                                             | D7   | S    | YOR069W | VPS5  | GRD2, PEP10, VPT5                             | Component of Vps5p-Vps17p-Vps26p-Vps29p-Vps35p retromer complex; homologous to mammalian sorting nexins            |
| 306                                                             | B5   | S    | YOR036W | VPS6  | PEP12, VPL6, VPT13                            | t-SNARE                                                                                                            |
| 301                                                             | E2   | S    | YAL002W | VPS8  | FUN15, VPT8                                   | Membrane-associated hydrophilic protein containing a C-terminal cysteine-rich region (RING-H2 finger)              |
| 330                                                             | G7   | S    | YML097C | VPS9  | VPL31, VPT9                                   | GEF for Vps21p                                                                                                     |
| 324                                                             | F2   | S    | YBL017C | VPS10 | PEP1, VPT1                                    | Sorting receptor for CPY and proteinase A; homologous to human sortilin                                            |
| 301                                                             | H9   | S    | YLL040C | VPS13 | SOI1, VPT2                                    | Involved in Golgi to endosome trafficking; homologous to mammalian chorein                                         |
| 372                                                             | C12  | S    | YPL045W | VPS16 | SVL6, VAM9, VPT16                             | Component of Vps11p-Vps18p-Vps16p-Vps33p-Vps39p-Vps41p complex                                                     |
| 318                                                             | B3   | S    | YOR132W | VPS17 | PEP21                                         | Component of Vps5p-Vps17p-Vps26p-Vps29p-Vps35p retromer complex; has PX domain                                     |
| 372                                                             | A5   | S    | YLR148W | VPS18 | PEP3, VAM8, VPS18, VPT18                      | Component of Vps11p-Vps18p-Vps16p-Vps33p-Vps39p-Vps41p complex                                                     |
| 327                                                             | E1   | S    | YDR323C | VPS19 | PEP7, VAC1, VPL21, VPT19                      | Involved in vacuolar sorting and inheritance; binds phosphatidylinositol 3-phosphate via FYVE domain               |
| 329                                                             | C10  | M    | YMR077C | VPS20 |                                               | Class E factor; small coiled coil protein; component of Vps2p-Vps20p-Vps24p-Vps32p complex                         |
| 306                                                             | E11  | S    | YOR089C | VPS21 | VPS12, VPT12, YPT21, YPT51                    | Rab5-like GTPase                                                                                                   |
| 323                                                             | A6   | M    | YPL002C | VPS22 | SNF8                                          | Class E factor; Component of Vps22p-Vps25p-Vps36p complex                                                          |
| 315                                                             | B9   | M    | YCL008C | VPS23 | STP22                                         | Component of Vps23p-Vps28p-Vps37p ESCRT-I complex; has UBC domain; binds ubiquitin; homologous to mammalian TSG101 |
| 316                                                             | G2   | M    | YKL041W | VPS24 | DID3                                          | Class E factor; Component of Vps2p-Vps20p-Vps24p-Vps32p complex; small coiled coil protein                         |
| 333                                                             | B1   | M    | YJR102C | VPS25 |                                               | Class E factor; Component of Vps22p-Vps25p-Vps36p complex                                                          |
| 332                                                             | E3   | S    | YJL053W | VPS26 | GRD6, PEP8, VPS26, VPT4                       | Component of Vps5p-Vps17p-Vps26p-Vps29p-Vps35p retromer complex                                                    |
| 339                                                             | C2   | S    | YNR006W | VPS27 | GRD11, DID7, SSV17, VPL23, VPL27, VPT27       | Controls traffic through prevacuolar compartment; binds PI3P via FYVE domain; homologous to mammalian Hrs          |
| 322                                                             | E12  | M    | YPL065W | VPS28 | VPT28                                         | Component of Vps23p-Vps28p-Vps37p ESCRT-I complex                                                                  |
| 313                                                             | H10  | S    | YHR012W | VPS29 | PEP11                                         | Component of Vps5p-Vps17p-Vps26p-Vps29p-Vps35p retromer complex                                                    |
| 309                                                             | C10  | S    | YPL120W | VPS30 | APG6, VPT30                                   | Involved in endosome to Golgi transport and autophagy; homologous to human beclin 1                                |
| 302                                                             | C10  | M    | YLR025W | VPS32 | SNF7, DID1                                    | Class E factor; small coiled coil protein; component of Vps2p-Vps20p-Vps24p-Vps32p complex                         |
| 372                                                             | D8   | S    | YLR396C | VPS33 | CLS14, MET27, PEP14, SLP1, VAM5, VPL25, VPT33 | Component of Vps11p-Vps18p-Vps16p-Vps33p-Vps39p-Vps41p complex                                                     |
| 372                                                             | B8   | S    | YLR240W | VPS34 | END12, PEP15, VPL7, VPT29                     | Phosphatidylinositol 3-kinase                                                                                      |
| 319                                                             | D10  | S    | YJL154C | VPS35 | GRD9, VPT7                                    | Component of Vps5p-Vps17p-Vps26p-Vps29p-Vps35p retromer complex                                                    |
| 320                                                             | C11  | M    | YLR417W | VPS36 | GRD12, VAC3, VPL11                            | Class E factor; Component of Vps22p-Vps25p-Vps36p ESCRT-II complex                                                 |
| 302                                                             | H6   | S    | YLR119W | VPS37 | SRN2                                          | Component of Vps23p-Vps28p-Vps37p ESCRT-I complex                                                                  |
| 319                                                             | H4   | S    | YLR360W | VPS38 | VPL17                                         | 439 aa                                                                                                             |
| 345                                                             | F10  | S    | YDL077C | VPS39 | CVT4, VAM6, VPL18, VPL22                      | Component of Vps11p-Vps18p-Vps16p-Vps33p-Vps39p-Vps41p complex                                                     |
| 310                                                             | D8   | S    | YDR080W | VPS41 | CVT8, FET2, SVL2, VAM2, VPL20                 | Component of Vps11p-Vps18p-Vps16p-Vps33p-Vps39p-Vps41p complex                                                     |
| 346                                                             | A5   | S    | YDR456W | VPS44 | NHX1                                          | Monovalent inorganic cation transporter                                                                            |
| 372                                                             | C3   | S    | YGL095C | VPS45 | STT10, VPL28                                  | Sec1p-like protein                                                                                                 |
| 348                                                             | B11  | S    | YDR484W | VPS52 | SAC2                                          | Suppressor of actin mutations; Component of Vps52p-Vps53p-Vps54p complex involved in endosome to Golgi transport   |
| 336                                                             | B12  | S    | YJL029C | VPS53 |                                               | Component of Vps52p-Vps53p-Vps54p complex involved in endosome to Golgi transport                                  |
| 335                                                             | D4   | S    | YDR027C | VPS54 | LUV1, RKI1, TCS3                              | Component of Vps52p-Vps53p-Vps54p complex involved in endosome to Golgi transport                                  |
| 347                                                             | H7   | S    | YJR044C | VPS55 |                                               | Transmembrane protein homologous to human OB-RGRP protein                                                          |
| 348                                                             | B12  | W    | YDR486C | VPS60 | MOS10                                         | Class E factor; small coiled coil protein                                                                          |
| <b>Other genes implicated in Vacuole Biogenesis or Function</b> |      |      |         |       |                                               |                                                                                                                    |
| 342                                                             | E10  | M    | YBR131W | CCZ1  |                                               | Calcium, caffeine, zinc sensitivity; sporulation defect                                                            |
| 316                                                             | E4   | M    | YKL002W | DID4  |                                               | Class E factor; small coiled coil protein; interacts with many proteins including Apg17p and Ypt31p                |
| 380                                                             | B1   | S    | YHL031C | GOS1  |                                               | v-SNARE                                                                                                            |
| 331                                                             | H5   | M    | YPR079W | MRL1  |                                               | Mannose 6-phosphate receptor homolog involved in vacuolar protein sorting                                          |

Supplemental Table 1

|                                                |     |   |           |              |                                      |                                                                                                            |
|------------------------------------------------|-----|---|-----------|--------------|--------------------------------------|------------------------------------------------------------------------------------------------------------|
| 331                                            | B1  | M | YMR004W   | <i>MVP1</i>  |                                      | Suppressor of <i>vps1</i> mutants                                                                          |
| 345                                            | C5  | M | YDL006W   | <i>PTC1</i>  | <i>CWH47, KCS2, TPD1</i>             | Protein phosphatase type 2C                                                                                |
| 380                                            | D4  | W | YDR137W   | <i>RGP1</i>  |                                      | Reduced growth phenotype; component of Ric1p-Rgp1p complex that functions as Ypt6p GEF                     |
| 330                                            | D3  | M | YLR039C   | <i>RIC1</i>  |                                      | Forms a complex with Rgp1p with GEF activity towards Ypt6p                                                 |
| 336                                            | B1  | M | YJL004C   | <i>SYS1</i>  |                                      | Multicopy suppressor of <i>ypt6</i> and <i>ric1</i> mutants; related to mammalian synptogyrin              |
| 307                                            | E4  | S | YOL018C   | <i>TLG2</i>  |                                      | t-SNARE                                                                                                    |
| 321                                            | G7  | S | YGL212W   | <i>VAM7</i>  |                                      | v-SNARE; has PX domain                                                                                     |
| 320                                            | E12 | M | YLR262C   | <i>YPT6</i>  |                                      | Rab6-like GTP-binding protein                                                                              |
| 303                                            | E9  | M | YML001W   | <i>YPT7</i>  | <i>AST4, VAM4</i>                    | Rab7-like GTP-binding protein                                                                              |
| <b>Vacuolar ATPase</b>                         |     |   |           |              |                                      |                                                                                                            |
| 337                                            | C9  | M | YDL185W   | <i>VMA1</i>  | <i>CLS8, TFP1</i>                    | Subunit of vacuolar ATPase, V1 subcomplex                                                                  |
| 343                                            | H11 | M | YBR127C   | <i>VMA2</i>  | <i>ATPVS, VAT2</i>                   | Subunit of vacuolar ATPase, V1 subcomplex                                                                  |
| 306                                            | H10 | S | YOR332W   | <i>VMA4</i>  |                                      | Subunit of vacuolar ATPase, V1 subcomplex; YOR331C on opposite strand also positive                        |
| 333                                            | F8  | M | YLR447C   | <i>VMA6</i>  |                                      | Subunit of vacuolar ATPase, V0 subcomplex                                                                  |
| 312                                            | A9  | M | YEL051W   | <i>VMA8</i>  |                                      | Subunit of vacuolar ATPase, V1 subcomplex                                                                  |
| 328                                            | G5  | M | YHR039C-B | <i>VMA10</i> | <i>YHR039C-B</i>                     | Subunit of vacuolar ATPase, V1 subcomplex                                                                  |
| 308                                            | D6  | M | YPL234C   | <i>VMA11</i> | <i>CLS9, TFP3</i>                    | Subunit of vacuolar ATPase, V0 subcomplex                                                                  |
| 317                                            | D2  | M | YKL119C   | <i>VMA12</i> | <i>CLS10, VPH2</i>                   | Involved in assembly of vacuolar ATPase                                                                    |
| 331                                            | E10 | M | YPR036W   | <i>VMA13</i> | <i>CLS11</i>                         | Subunit of vacuolar ATPase, V1 subcomplex                                                                  |
| 337                                            | F6  | M | YGR105W   | <i>VMA21</i> |                                      | Assembly factor for vacuolar ATPase localized to ER                                                        |
| 314                                            | C1  | M | YHR060W   | <i>VMA22</i> | <i>CEV1, VPH6</i>                    | Assembly factor for vacuolar ATPase localized to ER                                                        |
| 343                                            | F6  | M | YOR270C   | <i>VPH1</i>  |                                      | Subunit of vacuolar ATPase, V0 subcomplex                                                                  |
| <b>Glycosylation</b>                           |     |   |           |              |                                      |                                                                                                            |
| 380                                            | E6  | M | YLR342W   | <i>FKS1</i>  | <i>CND1, CWH53, ETG1, GSC1, PBR1</i> | 1,3 beta glucan synthase involved in cell wall assembly                                                    |
| 323                                            | E2  | M | YPR159W   | <i>KRE6</i>  | <i>CWH48</i>                         | Putative beta-glucan synthase involved in cell wall assembly                                               |
| 339                                            | G5  | M | YBR015c   | <i>MNN2</i>  | <i>TTP1</i>                          | Alpha-1,2-mannosyltransferase                                                                              |
| 372                                            | B10 | M | YPL050C   | <i>MNN9</i>  |                                      | Alpha 1,6-mannosyltransferase                                                                              |
| 319                                            | C5  | M | YJL183W   | <i>MNN11</i> |                                      | Alpha-1,3-mannosyltransferase; member of a complex with Mnn10p, Hoc1p, Anp1p, Mnn9p                        |
| 372                                            | C5  | M | YGL038C   | <i>OCH1</i>  | <i>NGD29</i>                         | Alpha-1,6-mannosyltransferase                                                                              |
| 306                                            | E7  | M | YOR085W   | <i>OST3</i>  |                                      | Dolichyl-diphosphooligosaccharide-protein glycosyltransferase                                              |
| 345                                            | H2  | M | YDL095W   | <i>PMT1</i>  |                                      | Dolichyl-phosphodolichyl phosphate-D-mannose;protein O-D-mannosyltransferase; acts in a complex with Pmt2p |
| 343                                            | E3  | M | YML115C   | <i>VAN1</i>  | <i>VRG7, VRG8</i>                    | Vanadate resistance protein; mannosyltransferase                                                           |
| <b>AP-3 Subunits</b>                           |     |   |           |              |                                      |                                                                                                            |
| 308                                            | F9  | M | YPL195W   | <i>APL5</i>  |                                      | Delta subunit of AP-3 complex                                                                              |
| 328                                            | E11 | M | YGR261C   | <i>APL6</i>  |                                      | Beta subunit of AP-3 complex                                                                               |
| 342                                            | F8  | M | YBR288C   | <i>APM3</i>  |                                      | Mu3 subunit of AP-3 complex                                                                                |
| 336                                            | B9  | M | YJL024C   | <i>APS3</i>  |                                      | Sigma3 subunit of AP-3 complex                                                                             |
| <b>ARF and ARF-Related</b>                     |     |   |           |              |                                      |                                                                                                            |
| 334                                            | G7  | M | YDL192W   | <i>ARF1</i>  |                                      | ADP-ribosylation factor 1; small GTP-binding protein of the Ras superfamily                                |
| 345                                            | B12 | S | YBR164C   | <i>ARL1</i>  |                                      | ARF-like protein 1; small GTP-binding protein                                                              |
| 322                                            | G1  | M | YPL051W   | <i>ARL3</i>  |                                      | ARF-like protein 3; small GTP-binding protein; cold sensitive growth                                       |
| <b>Monensin and Brefeldin A Hypersensitive</b> |     |   |           |              |                                      |                                                                                                            |
| 346                                            | F9  | M | YGL124C   | <i>MON1</i>  |                                      | Monensin and brefeldin A sensitivity; homologs in all eukaryotes                                           |
| 372                                            | B1  | M | YNL297C   | <i>MON2</i>  |                                      | Monensin and brefeldin A sensitivity; limited homology to Sec7p                                            |

Supplemental Table 1

| Actin-related      |     |     |          |               |                               |                                                                                                                                                        |
|--------------------|-----|-----|----------|---------------|-------------------------------|--------------------------------------------------------------------------------------------------------------------------------------------------------|
| 372                | A3  | M   | YEL036C  | <i>ANP1</i>   | <i>CAX1, GEM3, MCD2, MNN8</i> | Actin organization; protein glycosylation; retention of glycosyltransferases in Golgi complex                                                          |
| 310                | A1  | M   | YBR231C  | <i>AOR1</i>   |                               | Actin-overexpression resistant; mutant sensitive to NaCl and NaF                                                                                       |
| 348                | G5  | S   | YNL059C  | <i>ARP5</i>   |                               | Actin-related protein 5                                                                                                                                |
| 302                | F7  | M   | YLR085C  | <i>ARP6</i>   |                               | Actin-related protein 6                                                                                                                                |
| 337                | D9  | S   | YGR036C  | <i>CAX4</i>   |                               | Actin organization; genetic interactions with calmodulin; contains stretches of amino acids that are characteristic of phosphatases                    |
| 303                | G11 | M   | YMR032W  | <i>HOF1</i>   | <i>CYK2</i>                   | SH3 domain containing-protein required for cytokinesis                                                                                                 |
| 372                | A1  | M   | YOL076W  | <i>MDM20</i>  | <i>DEC1</i>                   | Regulates actin assembly; involved in mitochondrial inheritance                                                                                        |
| 310                | G6  | M   | YDR126W  | <i>PSL10</i>  |                               | Profilin synthetic lethal; interacts with <i>bre5</i> , mutant sensitive to BFA                                                                        |
| 321                | B6  | M   | YDR159W  | <i>SAC3</i>   |                               | Suppressor of actin mutations; involved in processes affecting the actin cytoskeleton and mitosis                                                      |
| 341                | E1  | W-M | YNL079C  | <i>TPM1</i>   |                               | Tropomyosin I; actin filament organization; suppressor of <i>mdm20</i>                                                                                 |
| Ribosomal Proteins |     |     |          |               |                               |                                                                                                                                                        |
| 342                | H7  | M   | YBR191W  | <i>RPL21A</i> |                               | Component of large ribosome subunit                                                                                                                    |
| 313                | H9  | M   | YHR010W  | <i>RPL27A</i> |                               | Component of large ribosome subunit                                                                                                                    |
| 334                | G6  | M   | YDL191W  | <i>RPL35A</i> | <i>SOS1</i>                   | Component of large ribosome subunit                                                                                                                    |
| 345                | G2  | M   | YDL081C  | <i>RPP1A</i>  |                               | Component of large ribosome subunit                                                                                                                    |
| 322                | D5  | M   | YPL090C  | <i>RPS6A</i>  |                               | Component of small ribosome subunit                                                                                                                    |
| Miscellaneous      |     |     |          |               |                               |                                                                                                                                                        |
| 329                | E6  | S   | YOL086C  | <i>ADH1</i>   | <i>ADC1</i>                   | Alcohol dehydrogenase                                                                                                                                  |
| 346                | E11 | M   | YGL105W  | <i>ARC1</i>   |                               | Associated with tRNA and amino acyl-tRNA synthetases; opposite 3' YGL104C ( <i>VPS73</i> )                                                             |
| 372                | A10 | M   | YLR399C  | <i>BDF1</i>   |                               | Transcription factor regulating sporulation; has two bromodomains                                                                                      |
| 322                | D10 | M   | YPL084W  | <i>BRO1</i>   | <i>LPF2</i>                   | BCK1-like resistance to osmotic shock; Temperature-sensitive growth defect; sensitive to caffeine; rhophilin homology; interacts with Vps4p and Vps32p |
| 301                | E5  | M   | YAR014C  | <i>BUD14</i>  |                               | Random budding in diploid null mutants; has SH3 domain                                                                                                 |
| 372                | D5  | M   | YGR262C  | <i>BUD32</i>  |                               | Diploid mutants exhibit random budding; has protein kinase domain                                                                                      |
| 325                | C10 | M   | YGL019W  | <i>CKB1</i>   |                               | Casein kinase II beta subunit                                                                                                                          |
| 339                | B4  | S   | YNL041C  | <i>COD2</i>   |                               | COmplexed with Dor1p 2                                                                                                                                 |
| 380                | D9  | S   | YGL223C  | <i>COD3</i>   |                               | COmplexed with Dor1p 3                                                                                                                                 |
| 341                | C11 | S   | YNL051W  | <i>COD4</i>   |                               | COmplexed with Dor1p 4                                                                                                                                 |
| 325                | B12 | M   | YGL005C  | <i>COD5</i>   |                               | COmplexed with Dor1p 5                                                                                                                                 |
| 337                | B1  | M   | YDL160C  | <i>DHHi</i>   |                               | Putative RNA helicase of DEAD box family; interacts with Rsp5, ubiquitin ligase                                                                        |
| 330                | F12 | M   | YML071C  | <i>DOR1</i>   |                               | Dependent On Ric1                                                                                                                                      |
| 310                | F4  | M   | YDR108W  | <i>GSG1</i>   | <i>TRS85</i>                  | Probably has role late in meiosis following DNA replication; cannot sporulate                                                                          |
| 325                | F4  | M   | YGL084C  | <i>GUP1</i>   |                               | Putative glycerol transporter                                                                                                                          |
| 306                | D8  | M   | YOR070C  | <i>GYP1</i>   |                               | GAP for Ypt1p                                                                                                                                          |
| 312                | A3  | M   | YEL044W  | <i>IES6</i>   |                               | Ino Eighty Subunit 6 ; chromatin remodelling                                                                                                           |
| 342                | D1  | S   | YKR019C  | <i>IRS4</i>   |                               | Increased rDNA silencing; has EH domain                                                                                                                |
| 372                | A6  | M   | YNL296W  | <i>KRE25</i>  |                               | Killer toxin resistant, opposite <i>MON2</i>                                                                                                           |
| 331                | F7  | M   | YPR051W  | <i>MAK3</i>   |                               | N-acetyltransferase; YPR050C on opposite strand also tested positive; interacts with Mak10p and Mak31p                                                 |
| 312                | A11 | M   | YEL053C  | <i>MAK10</i>  |                               | Glucose-repressible protein                                                                                                                            |
| 380                | E11 | M   | YMR091C  | <i>NPL6</i>   |                               | Nuclear protein targeting                                                                                                                              |
| 316                | G12 | M   | YKL055C  | <i>OAR1</i>   |                               | 3-oxoacyl-[acyl-carrier-protein] reductase; phospholipid remodelling                                                                                   |
| 372                | C1  | M   | YCR044C  | <i>PER1</i>   |                               | Protein processing in the ER                                                                                                                           |
| 331                | C11 | M   | YMR123W  | <i>PKR1</i>   |                               | Confers resistance to SMK toxin when overexpressed                                                                                                     |
| 347                | A7  | S   | YGL167C  | <i>PMR1</i>   | <i>BSD1</i>                   | Golgi Ca <sup>2+</sup> ATPase; YGL168W on opposite strand also positive                                                                                |
| 322                | A6  | M   | YGL246C  | <i>RAI1</i>   | <i>NRE387, G0580</i>          | RNA processing/modification                                                                                                                            |
| 323                | H5  | M   | YDR525W- | <i>SNA2</i>   |                               | Homology to PMP3/SNA1 (Sensitivity to Na <sup>+</sup> )                                                                                                |

Supplemental Table 1

|                          |     |   |         |              |                       |                                                                                                                          |
|--------------------------|-----|---|---------|--------------|-----------------------|--------------------------------------------------------------------------------------------------------------------------|
| 319                      | H3  | M | YLR357W | <i>RSC2</i>  |                       | Member of RSC complex, which remodels the structure of chromatin; YLR358C on opposite strand also positive               |
| 341                      | C6  | M | YDL194W | <i>SNF3</i>  |                       | Glucose permease or sensor                                                                                               |
| 311                      | H5  | M | YEL031W | <i>SPF1</i>  | <i>COD1</i>           | P-type ATPase; sensitivity to SMKT killer toxin; glycosylation defects                                                   |
| 345                      | E4  | M | YDL048C | <i>STP4</i>  |                       | Involved in pre-tRNA splicing and in uptake of branched-chain amino acids                                                |
| 308                      | A2  | M | YOL072W | <i>THP1</i>  |                       | Null mutant is viable and shows transcription-associated hyper-recombination and transcription elongation impairment     |
| 333                      | G10 | M | YMR060C | <i>TOM37</i> | <i>MAS37, PET3027</i> | Mitochondria outer membrane translocase protein transporter; 3' of FET3                                                  |
| 341                      | F5  | M | YNL107W | <i>YAF9</i>  |                       | Yeast homolog of human leukemogenic protein AF9; member of a large protein complex                                       |
| <b>Hypothetical ORFs</b> |     |   |         |              |                       |                                                                                                                          |
| 310                      | H4  | S | YDR136C | <i>VPS61</i> |                       | Hypothetical ORF; 190 aa; interacts with <i>SPO21</i>                                                                    |
| 313                      | A2  | M | YGR141W | <i>VPS62</i> |                       | Hypothetical ORF; 467 aa; closely homologous to YPR157W; interacts with Ste2p;                                           |
| 320                      | E11 | M | YLR261C | <i>VPS63</i> |                       | Hypothetical ORF; 108 aa                                                                                                 |
| 321                      | D6  | M | YDR200C | <i>VPS64</i> |                       | Hypothetical ORF; 604aa; has FHA domain; closely homologous to YLR238W                                                   |
| 321                      | A6  | M | YLR322W | <i>VPS65</i> |                       | Hypothetical ORF; 104 aa; opposite <i>SFH1</i> (systematic deletion of <i>SFH1</i> is inviable)                          |
| 323                      | C11 | M | YPR139C | <i>VPS66</i> |                       | Hypothetical ORF; 300 aa                                                                                                 |
| 326                      | E7  | S | YKR020W | <i>VPS67</i> |                       | Hypothetical ORF; 164 aa; interacts with Luv1p and Vps52p                                                                |
| 329                      | H6  | M | YOL129W | <i>VPS68</i> |                       | Hypothetical ORF; 184 aa; interacts with Gcs1p (Arf GAP)                                                                 |
| 331                      | H7  | M | YPR087W | <i>VPS69</i> |                       | Hypothetical ORF; 106 aa; opposite SRP54 (3'end); systematic deletion of SRP54 = inviable                                |
| 334                      | E7  | M | YJR126C | <i>VPS70</i> |                       | Hypothetical ORF; 811 aa; peptidase and transferrin receptor 2 homology                                                  |
| 343                      | B4  | M | YML041C | <i>VPS71</i> |                       | Hypothetical ORF; 280 aa; interacts with Bud7p                                                                           |
| 346                      | B11 | M | YDR485C | <i>VPS72</i> |                       | Hypothetical ORF; 810 aa                                                                                                 |
| 346                      | E10 | M | YGL104C | <i>VPS73</i> |                       | Hypothetical ORF; 486 aa; glucose transporter; interacts with Vam7p                                                      |
| 372                      | B3  | M | YDR372C | <i>VPS74</i> |                       | Hypothetical ORF; 345 aa; limited homology to Lte1 GDP/GTP exchange factor; homology to rat GMX33; interacts with Vps26p |
| 372                      | A7  | M | YNL246W | <i>VPS75</i> |                       | Hypothetical ORF; 264 aa; opposite YNL245c; 179aa; homologous to SET protein; interacts with Bud7p                       |
|                          |     |   |         |              |                       |                                                                                                                          |
