# Supplementary material
Source: PubMed Central journal article supplement (PMC117329)
Supplement: mbc_13_7_2486__2.pdf [file mbc_13_7_2486__2.pdf]

Supplemental Table 2

| Plate                                      | Well | Int. | ORF     | Gene         | Aliases                 | Description                                                                            |
|--------------------------------------------|------|------|---------|--------------|-------------------------|----------------------------------------------------------------------------------------|
| <b>Vacuole Biogenesis or Function</b>      |      |      |         |              |                         |                                                                                        |
| 333                                        | E1   | W    | YLR423C | <i>APG17</i> |                         | Involved in autophagy; required for activation of Apg1 protein kinase                  |
| 338                                        | F10  | W    | YCL038C | <i>AUT4</i>  |                         | Autophagy gene essential for breakdown of autophagic vesicles in the vacuole           |
| 342                                        | G3   | W    | YCR032W | <i>BPH1</i>  |                         | Beige protein homolog 1                                                                |
| 307                                        | B4   | W    | YOR357C | <i>GRD19</i> | <i>SNX3</i>             | Functions in Golgi retention; contains PX domain found in human SNX1 (Sorting Nexin-1) |
| 320                                        | H10  | W    | YLR309C | <i>IMH1</i>  | <i>SYS3</i>             | Synthetic interactions with <i>RIC1</i> and <i>YPT6</i>                                |
| 332                                        | F2   | W    | YJL036W | <i>SNX4</i>  |                         | Sorting NeXin                                                                          |
| 327                                        | D11  | W    | YDR320C | <i>SWA2</i>  |                         | Auxilin-like protein                                                                   |
| 320                                        | A10  | W    | YLR386W | <i>VAC14</i> |                         | Involved in vacuole inheritance                                                        |
| 317                                        | H9   | W    | YOR106W | <i>VAM3</i>  | <i>PTH1</i>             | t-SNARE; Golgi to vacuole transport                                                    |
| 311                                        | B1   | W    | YDR359C | <i>VID21</i> |                         | Vacuolar import and degradation                                                        |
| 320                                        | A1   | W    | YLR373C | <i>VID22</i> |                         | Vacuole import and degradation                                                         |
| 316                                        | G11  | W    | YKL054  | <i>VID31</i> |                         | Vacuole import and degradation                                                         |
| <b>Vacuolar ATPase</b>                     |      |      |         |              |                         |                                                                                        |
| 336                                        | D9   | W    | YJR033C | <i>RAV1</i>  |                         | Regulator of vacuolar ATPase                                                           |
| 341                                        | G6   | W    | YDR202C | <i>RAV2</i>  |                         | Regulator of vacuolar ATPase                                                           |
| 311                                        | G12  | W    | YEL027W | <i>VMA3</i>  | <i>CUP5, CLS7, GEF2</i> | Subunit of vacuolar ATPase, V0 sector                                                  |
| 370                                        | E3   | W    | YKL080W | <i>VMA5</i>  | <i>CSL5, VAT3</i>       | Subunit of vacuolar ATPase, V1 sector                                                  |
| 322                                        | C12  | W    | YGR020C | <i>VMA7</i>  |                         | Subunit of vacuolar ATPase, V1 sector                                                  |
| <b>Glycosylation or Cell Wall Assembly</b> |      |      |         |              |                         |                                                                                        |
| 308                                        | D10  | W    | YPL227C | <i>ALG5</i>  |                         | UDP-glucose:dolichyl-phosphate glucosyltransferase                                     |
| 315                                        | B8   | W    | YCL007C | <i>CWH36</i> |                         | Cell wall assembly; calcofluor hypersensitivity                                        |
| 333                                        | A6   | W    | YJR075W | <i>HOC1</i>  |                         | Alpha-1,6-mannosyltransferase                                                          |
| 305                                        | C12  | W    | YNL322C | <i>KRE1</i>  |                         | Cell wall assembly                                                                     |
| 313                                        | B9   | W    | YGR166W | <i>KRE11</i> | <i>TRS65</i>            | Cell wall assembly                                                                     |
| 323                                        | E2   | W    | YPR159W | <i>KRE6</i>  | <i>CWH48</i>            | Cell wall assembly; beta-glucan synthase (putative)                                    |
| 301                                        | C9   | W    | YAL023C | <i>PMT2</i>  | <i>FUN25</i>            | Dolichyl-phosphate-mannose-protein mannosyltransferase                                 |
| 325                                        | B1   | W    | YBL082C | <i>RHK1</i>  | <i>ALG3</i>             | Resistance to Hansenula killer 1; Dol-P-Man dependent alpha(1-3) mannosyltransferase   |
| 324                                        | C10  | W    | YGR229C | <i>SMI1</i>  | <i>KNR4</i>             | Cell wall assembly; involved in (1,3)-beta-glucan synthesis                            |
| 342                                        | A11  | W    | YJL139C | <i>YUR1</i>  |                         | Cell wall assembly; mannosyltransferase                                                |
| 312                                        | G6   | W    | YER083C |              |                         | Protein involved in cell wall function                                                 |

Supplemental Table 2

| <b>ARF GAPs</b>                   |     |   |           |        |             |                                                                                          |
|-----------------------------------|-----|---|-----------|--------|-------------|------------------------------------------------------------------------------------------|
| 327                               | G9  | W | YIL044C   | AGE2   | SAT2        | Arf GAP                                                                                  |
| 335                               | A4  | W | YDL226C   | GCS1   |             | Arf GAP                                                                                  |
| 347                               | C9  | W | YER122C   | GLO3   |             | Arf GAP                                                                                  |
| <b>Actin-related</b>              |     |   |           |        |             |                                                                                          |
| 305                               | F5  | W | YNL271C   | BNI1   | PPF3        | Protein involved in actin filament organization; has FH domain; interacts with Rho1p     |
| 326                               | C11 | W | YKL212W   | SAC1   | RSD1        | Suppressor of actin mutations; integral membrane protein localizing to the ER and Golgi  |
| 311                               | C10 | W | YDR389W   | SAC7   |             | Suppressor of actin mutations; Rho GTPase activator                                      |
| <b>Brefeldin A Hypersensitive</b> |     |   |           |        |             |                                                                                          |
| 318                               | E4  | W | YOR198C   | BFR1   |             | Multicopy suppressor of brefeldin A-induced lethality; secretion and nuclear segregation |
| 333                               | H7  | W | YNR051C   | BRE5   |             | Brefeldin A sensitivity; has NTF2 domain; limited Ras GAP homology                       |
| 324                               | C5  | W | YGL012W   | ERG4   |             | Brefeldin A sensitivity; sterol C-24(28) reductase                                       |
| <b>Protein Trafficking</b>        |     |   |           |        |             |                                                                                          |
| 340                               | B8  | W | YBR059C   | AKL1   |             | Ark-family kinase-like protein                                                           |
| 327                               | A7  | W | YDR264C   | AKRI   |             | Ankyrin repeat-containing protein involved in endocytosis and signal transduction        |
| 328                               | B1  | W | YFL025C   | BST1   |             | Negatively regulates COPII vesicle formation                                             |
| 301                               | A10 | W | YAL058W   | CNE1   | FUN48       | Calnexin and calreticulin homolog; functions in endoplasmic reticulum quality control    |
| 311                               | D11 | W | YDR414C   | ERD1   |             | Protein required for retention of luminal ER proteins                                    |
| 334                               | F11 | W | YML067C   | ERV41  |             | ER vesicle protein                                                                       |
| 317                               | A4  | W | YKL073W   | LHS1   | CER1, SSI1  | Required for efficient translocation of proteins across the ER membrane                  |
| 318                               | E12 | W | YOR216C   | RUD3   | GRP1        | Relieves uso1-1 transport defect; golgin-160 related protein                             |
| 316                               | C8  | W | YLR208W   | SEC13  |             | COPII subunit                                                                            |
| 320                               | F6  | W | YLR268W   | SEC22  | SLY2, TSL26 | Synaptobrevin (v-SNARE) homolog present on ER to Golgi vesicles                          |
| 372                               | E12 | W | YBR171W   | SEC66  | HSS1, SEC71 | Signal recognition particle receptor                                                     |
| 335                               | F3  | W | YBR283C   | SSH1   |             | Sec61p homolog involved in co-translational pathway of protein transport                 |
| 332                               | F5  | W | YER031C   | YPT31  | YPT8        | Rab-like GTP binding proteins; intra-Golgi transport                                     |
| <b>Ribosomal Proteins</b>         |     |   |           |        |             |                                                                                          |
| 320                               | C7  | W | YGR085C   | RPL11B |             | Component of large ribosome subunit                                                      |
| 312                               | B1  | W | YEL054C   | RPL12A |             | Component of large ribosome subunit                                                      |
| 330                               | D8  | W | YMR142C   | RPL13B |             | Component of large ribosome subunit                                                      |
| 348                               | G6  | W | YNL069C   | RPL16B | RP23        | Component of large ribosome subunit                                                      |
| 342                               | B9  | W | YJL177W   | RPL17B |             | Component of large ribosome subunit                                                      |
| 328                               | E7  | W | YFR031C-A | RPL2A  | RPL5B       | Component of large ribosome subunit                                                      |
| 304                               | D2  | W | YMR194W   | RPL36A | RPL39B      | Component of large ribosome subunit                                                      |

Supplemental Table 2

|     |     |   |         |               |                          |                                     |
|-----|-----|---|---------|---------------|--------------------------|-------------------------------------|
| 316 | B10 | W | YLR185W | <i>RPL37A</i> |                          | Component of large ribosome subunit |
| 342 | B11 | W | YJL189W | <i>RPL39</i>  | <i>PUB2, RPL46, SPB2</i> | Component of large ribosome subunit |
| 340 | F9  | W | YIL148W | <i>RPL40A</i> | <i>UBI1</i>              | Component of large ribosome subunit |
| 348 | F12 | W | YML073C | <i>RPL6A</i>  | <i>YL16A</i>             | Component of large ribosome subunit |
| 338 | C8  | W | YGL076C | <i>RPL7A</i>  |                          | Component of large ribosome subunit |
| 336 | H7  | W | YDL130W | <i>RPP1B</i>  | <i>RPL44', RPLA3</i>     | Component of large ribosome subunit |
| 342 | A9  | W | YJL136C | <i>RPS21B</i> |                          | Component of small ribosome subunit |
| 320 | A12 | W | YLR388W | <i>RPS29A</i> |                          | Component of small ribosome subunit |
| 341 | F12 | W | YBR189W | <i>RPS9B</i>  | <i>RPS13A, SUP46</i>     | Component of small ribosome subunit |

**Miscellaneous**

|     |     |   |         |              |                    |                                                                                         |
|-----|-----|---|---------|--------------|--------------------|-----------------------------------------------------------------------------------------|
| 380 | F3  | W | YGR204W | <i>ADE3</i>  |                    | C1-tetrahydrofolate synthase required for the biosynthesis of purines                   |
| 333 | B3  | W | YJR105W | <i>ADOI</i>  |                    | Adenosine kinase                                                                        |
| 317 | C10 | W | YKL114C | <i>APN1</i>  |                    | Major apurinic/aprimidinic endonuclease/3'-repair diesterase                            |
| 346 | H3  | W | YGL148W | <i>ARO2</i>  |                    | Chorismate synthase                                                                     |
| 348 | H4  | W | YNL315C | <i>ATP11</i> |                    | Mitochondrial chaperone                                                                 |
| 333 | D5  | W | YKR099W | <i>BAS1</i>  |                    | Transcription factor                                                                    |
| 380 | F11 | W | YER016W | <i>BIM1</i>  | <i>YEB1</i>        | Structural protein of cytoskeleton (microtubules)                                       |
| 335 | F7  | W | YBR290W | <i>BSD2</i>  |                    | Putative metal transport protein                                                        |
| 322 | E8  | W | YPL069C | <i>BTS1</i>  |                    | Geranylgeranyl diphosphate synthase required for membrane attachment of Ypt1p and Sec4p |
| 335 | H10 | W | YCR063W | <i>BUD31</i> |                    | Diploid mutants exhibit random budding                                                  |
| 380 | C9  | W | YCR002C | <i>CDC10</i> |                    | Structural protein of cytoskeleton (septin)                                             |
| 323 | A3  | W | YPL008W | <i>CHL1</i>  | <i>CTF1, LPA9</i>  | DEAD box protein involved in mitotic chromosome segregation                             |
| 322 | H11 | W | YPL018W | <i>CTF19</i> | <i>MCM18</i>       | Kinetochore protein important for chromosome segregation                                |
| 323 | C9  | W | YPR135W | <i>CTF4</i>  | <i>CHL15, POB1</i> | DNA polymerase alpha binding protein                                                    |
| 342 | C7  | W | YKL139W | <i>CTK1</i>  |                    | Putative kinase subunit of complex that phosphorylates the RPO21 CTD                    |
| 330 | H11 | W | YML112W | <i>CTK3</i>  |                    | RNA polymerase II C-terminal domain kinase gamma subunit                                |
| 335 | F8  | W | YBR291C | <i>CTP1</i>  |                    | Citrate transport protein; in 3' of BSD2                                                |
| 336 | G9  | W | YDL117W | <i>CYK3</i>  |                    | involved in CYtoKinesis                                                                 |
| 328 | H5  | W | YIR027C | <i>DAL1</i>  |                    | Allantoinase                                                                            |
| 326 | E9  | W | YKR024C | <i>DBP7</i>  |                    | ATP dependent RNA helicase                                                              |
| 338 | E1  | W | YIL010W | <i>DOT5</i>  |                    | Derepression Of Telomeric silencing                                                     |
| 327 | B9  | W | YDR284C | <i>DPP1</i>  | <i>ZRG1</i>        | Diacylglycerol pyrophosphate phosphatase involved in phospholipid metabolism            |
| 319 | C1  | W | YOR144C | <i>EFD1</i>  |                    | Enhanced frequency of direct-repeat recombination                                       |
| 316 | G7  | W | YKL048C | <i>ELM1</i>  |                    | Protein kinase involved in cytokinesis, axial budding, and osmotic response             |
| 372 | B2  | W | YNL280C | <i>ERG24</i> |                    | Sterol C-14 reductase involved in ergosterol biosynthesis                               |
| 312 | D12 | W | YER044C | <i>ERG28</i> |                    | Ergosterol biosynthesis                                                                 |
| 311 | B3  | W | YDR363W | <i>ESC2</i>  |                    | Establishes Silent Chromatin                                                            |

Supplemental Table 2

|     |     |   |           |               |                         |                                                                                        |
|-----|-----|---|-----------|---------------|-------------------------|----------------------------------------------------------------------------------------|
| 305 | B8  | W | YMR307W   | <i>GAS1</i>   | <i>CWH52, GGP1</i>      | GPI-anchored surface protein (115-120 kDa)                                             |
| 348 | E7  | W | YGR252W   | <i>GCN5</i>   | <i>ADA4, SWI9</i>       | Functions in the Ada, SAGA complexes to acetylate nucleosome histones                  |
| 312 | A1  | W | YEL042W   | <i>GDA1</i>   |                         | Guanosine diphosphatase of Golgi membrane                                              |
| 336 | E2  | W | YJR040W   | <i>GEF1</i>   |                         | Transport protein involved in intracellular iron metabolism (putative)                 |
| 328 | H2  | W | YIR024C   | <i>GIF1</i>   |                         | G1 Factor needed for normal G1 phase                                                   |
| 335 | H11 | W | YCR065W   | <i>HCM1</i>   |                         | Dosage-dependent suppressor of cmd1-1 mutation; homology to forkhead family            |
| 339 | H10 | W | YBR034C   | <i>HMT1</i>   | <i>HCP1, ODP1, RMT1</i> | hnRNP methyltransferase                                                                |
| 318 | H7  | W | YOR258W   | <i>HNT3</i>   |                         | Histidine triad superfamily, third branch                                              |
| 310 | H5  | W | YDR138W   | <i>HPR1</i>   |                         | Hyperrecombination protein that suppresses intrachromosomal excision recombination     |
| 321 | E11 | W | YDR225W   | <i>HTA1</i>   | <i>H2A1, SPT11</i>      | Histone H2A                                                                            |
| 335 | G5  | W | YCR020W-B | <i>HTL1</i>   |                         | High-temperature lethal                                                                |
| 307 | D11 | W | YOL012C   | <i>HTZI</i>   | <i>HTA3</i>             | Chromatin binding, histone-related protein that can suppress histone H4 point mutation |
| 302 | G2  | W | YLR095C   | <i>IOC2</i>   |                         | Iswi One Complex involved in chromatin remodelling                                     |
| 312 | C11 | W | YER019W   | <i>ISC1</i>   |                         | Phospholipase C                                                                        |
| 310 | A9  | W | YBR245C   | <i>ISWI</i>   | <i>SGN2</i>             | ATPase component of a four subunit chromatin remodeling complex                        |
| 323 | E4  | W | YPR164W   | <i>KIM3</i>   |                         | Killed in mutagen; sensitive to diepoxybutane and/or mitomycin C                       |
| 334 | A11 | W | YAL058C-A | <i>KRE20</i>  |                         | Killer toxin REsistant 20                                                              |
| 372 | F2  | W | YDR532C   | <i>KRE28</i>  |                         | Killer toxin REsistant 28                                                              |
| 332 | D8  | W | YJL062W   | <i>LAS21</i>  | <i>GPI7</i>             | Local Anesthetics Sensitive; involved in the attachment of GPI anchors to proteins.    |
| 328 | D1  | W | YFR001W   | <i>LOC1</i>   |                         | Localization of mRNA                                                                   |
| 346 | C9  | W | YDR503C   | <i>LPP1</i>   |                         | Lipid phosphate phosphatase                                                            |
| 311 | B12 | W | YDR378C   | <i>LSM6</i>   |                         | Like Sm-F protein; snRNP protein                                                       |
| 348 | H2  | W | YNL268W   | <i>LYP1</i>   |                         | Lysine permease                                                                        |
| 342 | D5  | W | YKL029C   | <i>MAE1</i>   |                         | Mitochondrial malic enzyme                                                             |
| 348 | F3  | W | YGR289C   | <i>MAL11</i>  | <i>AGT1</i>             | General alpha-glucoside:hydrogen symporter; part of MAL1 complex locus                 |
| 303 | H2  | W | YMR036C   | <i>MIHI</i>   |                         | Protein tyrosine phosphatase that induces M-phase                                      |
| 328 | H3  | W | YIR025W   | <i>MND2</i>   |                         | Meiotic recombination; opposite YIR024C                                                |
| 316 | E8  | W | YKL009W   | <i>MRT4</i>   |                         | mRNA turnover 4                                                                        |
| 331 | A11 | W | YML128C   | <i>MSC1</i>   |                         | Meiotic Sister-Chromatid recombination                                                 |
| 340 | H11 | W | YIR009W   | <i>MSL1</i>   |                         | U2 snRNP component involved in splicing                                                |
| 323 | C8  | W | YPR134W   | <i>MSS18</i>  |                         | Protein involved in splicing intron a15beta of COX1                                    |
| 317 | A5  | W | YKL074C   | <i>MUD2</i>   |                         | Involved in early pre-mRNA splicing                                                    |
| 332 | G3  | W | YHR004C   | <i>NEM1</i>   |                         | Nuclear Envelope Morphology                                                            |
| 305 | A4  | W | YMR285C   | <i>NGL2</i>   |                         | Putative RNase/DNase; homologous to Drosophila Angelgene                               |
| 308 | G12 | W | YPL174C   | <i>NIP100</i> | <i>PAC13</i>            | Nuclear import protein; large subunit of dynactin complex                              |

Supplemental Table 2

|     |     |   |         |               |                                      |                                                                                                    |
|-----|-----|---|---------|---------------|--------------------------------------|----------------------------------------------------------------------------------------------------|
| 316 | H3  | W | YKL057C | <i>NUP120</i> | <i>RAT2</i>                          | Nucleoporin; mRNA-nucleus export                                                                   |
| 336 | G8  | W | YDL116W | <i>NUP84</i>  |                                      | Component of nuclear pores                                                                         |
| 336 | E8  | W | YJR051W | <i>OSM1</i>   |                                      | Fumarate reductase (NADH); osmotic growth protein; sensitive to hypertonic medium                  |
| 319 | C8  | W | YJL179W | <i>PF1</i>    |                                      | Prefoldin subunit 1; chaperone                                                                     |
| 380 | C5  | W | YOR104W | <i>PIN2</i>   |                                      | [PSI <sup>+</sup> ] prion induction; may also disrupt YOR105W; hypothetical ORF 108 aa             |
| 372 | F4  | W | YPL268W | <i>PLC1</i>   |                                      | 1-phosphatidylinositol-4,5-bisphosphate phosphodiesterase                                          |
| 325 | C2  | W | YGL006W | <i>PMC1</i>   |                                      | Ca <sup>2+</sup> ATPase (putative)                                                                 |
| 380 | B4  | W | YPL188W | <i>POS5</i>   |                                      | Involved in oxidative stress                                                                       |
| 327 | C8  | W | YDR300C | <i>PRO1</i>   |                                      | Gamma-glutamyl kinase; catalyzes first step in proline biosynthesis                                |
| 335 | C5  | W | YDR014W | <i>RAD61</i>  |                                      | Affects radiation sensitivity.                                                                     |
| 345 | G9  | W | YDL090C | <i>RAM1</i>   | <i>DPR1, FUS8, SCG2, SGP2, STE16</i> | Farnesyltransferase beta subunit involved in Ras processing                                        |
| 321 | D3  | W | YDR195W | <i>REF2</i>   |                                      | RNA-binding protein involved in cleavage step of mRNA 3'-end formation                             |
| 341 | A8  | W | YNL139C | <i>RLR1</i>   | <i>THO2, ZRG13</i>                   | Involved in transcription                                                                          |
| 337 | E10 | W | YGR056W | <i>RSC1</i>   |                                      | Rsc1p is a component of the RSC complex, which remodels the structure of chromatin                 |
| 313 | F6  | W | YHL034C | <i>SBP1</i>   | <i>SSBR1</i>                         | RNA processing; single stranded nucleic acid binding protein                                       |
| 304 | C12 | W | YMR190C | <i>SGS1</i>   |                                      | DNA helicase signature motifs; involved in maintaining genome stability                            |
| 324 | H6  | W | YBL058W | <i>SHP1</i>   |                                      | Suppressor of the overexpression of the phosphoprotein phosphatase 1 Glc7p                         |
| 302 | F1  | W | YLR079W | <i>SIC1</i>   | <i>SDB25</i>                         | P40 inhibitor of Cdc28p-Clb5 protein kinase complex                                                |
| 315 | A12 | W | YHR206W | <i>SKN7</i>   | <i>BRY1, POS9</i>                    | Protein with similarity to DNA-binding region of heat shock transcription factors                  |
| 339 | C9  | W | YNR015w | <i>SMM1</i>   |                                      | tRNA dihydrouridine synthase; Suppressor of Mitochondrial Mutation in the tRNA <sup>asp</sup> gene |
| 348 | B9  | W | YDR477W | <i>SNF1</i>   | <i>CAT1, CCR1, GLC2, HAF3, PAS14</i> | Serine/threonine kinase required for release from glucose repression                               |
| 342 | F9  | W | YBR289W | <i>SNF5</i>   | <i>HAF4, SWI10, TYE4</i>             | Non-specific RNA polymerase II transcription factor; opposite APM3, not overlapping                |
| 301 | D9  | W | YAL009W | <i>SPO7</i>   |                                      | Required for recombination, meiosis, glycogen degradation and sporulation                          |
| 331 | D1  | W | YMR125W | <i>STO1</i>   | <i>CBC1, GCR3, CBP80</i>             | Large subunit of the nuclear cap-binding protein complex                                           |
| 327 | D2  | W | YDR310C | <i>SUM1</i>   |                                      | Involved in chromatin silencing                                                                    |
| 327 | E5  | W | YDR334W | <i>SWR1</i>   |                                      | Sick With RSC; involved in chromatin remodeling; putative ATPase                                   |
| 311 | D2  | W | YDR395W | <i>SXM1</i>   | <i>KAP108</i>                        | Importin-beta like gene product; karyopherin beta family member                                    |
| 321 | B7  | W | YDR161W | <i>TC11</i>   |                                      | Protein phosphatase Two C-Interacting protein                                                      |
| 332 | E4  | W | YJL052W | <i>TDH1</i>   | <i>GLD3</i>                          | Glyceraldehyde-3-phosphate dehydrogenase 1                                                         |
| 380 | F10 | W | YPR163C | <i>TIF3</i>   | <i>RBL3, STM1</i>                    | Translation initiation factor eIF-4B                                                               |
| 321 | D9  | W | YDR207C | <i>UME6</i>   | <i>CAR80, NIM2, RIM16</i>            | Regulation of both repression and induction of early meiotic genes                                 |
| 305 | G6  | W | YGR072W | <i>UPF3</i>   | <i>SUA6</i>                          | Factor stimulating decay of mRNAs containing premature stop codons                                 |
| 338 | D11 | W | YIL008W | <i>URM1</i>   |                                      | Ubiquitin-like protein                                                                             |
| 342 | B1  | W | YJL141C | <i>YAK1</i>   |                                      | Serine-threonine protein kinase                                                                    |
| 328 | F4  | W | YGR270W | <i>YTA7</i>   |                                      | Member of Cdc48p/Pas1p/Sec18p family of ATPases                                                    |
| 328 | H4  | W | YIR026C | <i>YVH1</i>   |                                      | Protein tyrosine phosphatase induced by nitrogen starvation                                        |
| 333 | B8  | W | YJR127C | <i>ZMS1</i>   |                                      | Transcription factor                                                                               |

Supplemental Table 2

| Hypothetical ORFs |     |   |         |             |                                                                                                  |
|-------------------|-----|---|---------|-------------|--------------------------------------------------------------------------------------------------|
| 345               | D10 | W | YDL033C |             | tRNA (5-methylaminomethyl-2-thiouridylate)-methyltransferase                                     |
| 341               | E2  | W | YNL080C |             | Deletion causes slight growth defect, similar to <i>U. maydis</i> Myp1 protein                   |
| 341               | E12 | W | YNL099C |             | Protein phosphatase involved in cell cycle control and stress                                    |
| 301               | D12 | W | YAL004W |             | Hypothetical ORF; 215 aa; opposite <i>SSA1</i> , ATPase/chaperone                                |
| 301               | D7  | W | YAL011W |             | Hypothetical ORF; 638 aa                                                                         |
| 301               | D5  | W | YAL014C |             | Hypothetical ORF; 205 aa                                                                         |
| 310               | A11 | W | YBR246W |             | Hypothetical ORF; 387 aa                                                                         |
| 310               | B11 | W | YBR266C |             | Hypothetical ORF; 150 aa                                                                         |
| 310               | B12 | W | YBR267W |             | Hypothetical ORF; 393 aa                                                                         |
| 342               | G4  | W | YCR033W | <i>SNT1</i> | Hypothetical ORF; 1226 aa                                                                        |
| 335               | H6  | W | YCR050C |             | Hypothetical ORF; 102 aa                                                                         |
| 336               | F8  | W | YDL096C |             | Hypothetical ORF; 108 aa; opposite 5' <i>PMT1</i> dolichyl-phosphateprotein mannosyl-transferase |
| 380               | D2  | W | YDL119C |             | Hypothetical ORF; 307 aa; mitochondrial transporter; opposite YDL118W                            |
| 310               | F2  | W | YDR105C |             | Hypothetical ORF; 473 aa                                                                         |
| 321               | C11 | W | YDR186C |             | Hypothetical ORF; 877 aa                                                                         |
| 321               | D7  | W | YDR203W |             | Hypothetical ORF; 105 aa; opposite YDR200C                                                       |
| 311               | E7  | W | YDR425W |             | Hypothetical ORF; 625 aa; opposite YDR426c                                                       |
| 311               | E8  | W | YDR426C |             | Hypothetical ORF; 125 aa; opposite YDR425w                                                       |
| 312               | A2  | W | YEL043W |             | Hypothetical ORF; 956 aa                                                                         |
| 338               | B7  | W | YGL020C |             | Hypothetical ORF; 235 aa                                                                         |
| 325               | E10 | W | YGL072C |             | Hypothetical ORF; 119 aa                                                                         |
| 321               | F9  | W | YGL198W |             | Hypothetical ORF; 452aa; putative oxidoreductase                                                 |
| 337               | F2  | W | YGR064W |             | Hypothetical ORF; 122 aa; opposite <i>SPT4</i> encoding transcription regulator                  |
| 313               | D11 | W | YGR206W |             | Hypothetical ORF; 101aa                                                                          |
| 313               | F10 | W | YHL029C |             | Hypothetical ORF; 679aa                                                                          |
| 332               | G6  | W | YHR009C |             | Hypothetical ORF; 518 aa                                                                         |
| 314               | E5  | W | YHR111W |             | Hypothetical ORF; 440aa; protein conjugation factor                                              |
| 315               | A7  | W | YHR199C |             | Hypothetical ORF; 310aa                                                                          |
| 338               | F1  | W | YIL067C |             | Hypothetical ORF; 678aa                                                                          |
| 340               | D8  | W | YIL110W |             | Hypothetical ORF; 377 aa; 3' of <i>SEC24</i>                                                     |
| 372               | D6  | W | YJL075C |             | Hypothetical ORF; 138aa; opposite <i>NET1</i> (nucleolus)                                        |
| 336               | C11 | W | YJR018W |             | Hypothetical ORF; 120 aa; opposite <i>ESS1</i> (mRNA processing)                                 |
| 333               | A8  | W | YJR079W |             | Hypothetical ORF; 109aa                                                                          |
| 334               | D9  | W | YJR100C |             | Hypothetical ORF; 327 aa                                                                         |
| 326               | F3  | W | YKR035C |             | Hypothetical ORF; 213 aa; opposite <i>DID2</i>                                                   |
| 302               | G12 | W | YLR111W |             | Hypothetical ORF; 110 aa                                                                         |

Supplemental Table 2

|     |     |   |           |  |  |                                                    |
|-----|-----|---|-----------|--|--|----------------------------------------------------|
| 316 | B7  | W | YLR181C   |  |  | Hypothetical ORF; 330aa                            |
| 316 | D12 | W | YLR225C   |  |  | Hypothetical ORF; 407aa                            |
| 372 | C11 | W | YLR350W   |  |  | Hypothetical ORF; 216 aa                           |
| 320 | A2  | W | YLR374C   |  |  | Hypothetical ORF; 129 aa; in 5'UTR of <i>VID22</i> |
| 320 | A7  | W | YLR381W   |  |  | Hypothetical ORF; 733 aa                           |
| 333 | E3  | W | YLR426W   |  |  | Hypothetical ORF; 326aa; oxidoreductase            |
| 333 | E11 | W | YLR435W   |  |  | Hypothetical ORF; 249aa                            |
| 303 | D9  | W | YML013C-A |  |  | Hypothetical ORF; 125 aa; opposite YML014W         |
| 305 | B1  | W | YMR299C   |  |  | Hypothetical ORF; 312 aa                           |
| 341 | B3  | W | YNL127W   |  |  | Hypothetical ORF; 953 aa                           |
| 341 | A9  | W | YNL136W   |  |  | Hypothetical ORF; 425aa                            |
| 318 | B7  | W | YOR135C   |  |  | Hypothetical ORF; 113aa                            |
| 306 | F8  | W | YOR292C   |  |  | Hypothetical ORF; 309 aa                           |
| 308 | G4  | W | YPL184C   |  |  | Hypothetical ORF; 612 aa                           |
